# Supplementary material for: An analysis of instabilities and limit cycles in glacier-dammed reservoirs
Source: Copernicus journal article supplement (doi:10.5194/tc-14-3175-2020), 2020-09-18
Supplement: Supplementary file 2 [file tc-14-3175-2020-supplement.zip]

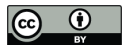

## *Supplement of*

# **An analysis of instabilities and limit cycles in glacier-dammed reservoirs**

**Christian Schoof**

*Correspondence to:* Christian Schoof ([cschoof@eoas.ubc.ca](mailto:cschoof@eoas.ubc.ca))

- [tc-14-3175-2020-supplement-title-page.pdf](#)
- [extended\\_model\\_final.zip](#)
- [lumped\\_model\\_final.zip](#)
- [supplementary.pdf](#)

The copyright of individual parts of the supplement might differ from the CC BY 4.0 License.
